# Supplementary material for: Transferability and Fine Mapping of Type 2 Diabetes Loci in African Americans: The Candidate Gene Association Resource Plus Study
Source: PubMed Central journal article supplement — Diabetes. 2013 Feb 14;62(3):965–76. doi: 10.2337/db12-0266 (PMC3581206; doi:10.2337/db12-0266), 2013-02-14
Supplement: supp_db12-0266_DB120266SupplementaryData.pdf [file supp_db12-0266_DB120266SupplementaryData.pdf]

## SUPPLEMENTARY DATA

**ARIC.** The ARIC study is a prospective population-based study of atherosclerosis and cardiovascular disease that included 15792 participants (27% AfA) aged 45-64 years at baseline visit from four US communities (1). In this study, 955 T2D subjects diagnosed at any of the baseline or follow up visits and 414 subjects with normal glucose tolerance (NGT) in all visits were included. All subjects were self-reported AfA recruited from two communities (Jackson, MS and Forsyth, NC).

**CARDIA.** The CARDIA study is a prospective multi-center investigation of the natural history and etiology of cardiovascular disease that included 5115 participants (52% AfA) aged 18-30 years at baseline visit from four US communities (Birmingham, AL; Chicago, IL; Minneapolis, MN and Oakland, CA) (2). Follow-up examinations occurred at years 2, 5, 7, 10, 15 and 20. In this study, 94 T2D subjects diagnosed at any visits and 654 subjects with NGT in all visits were included. All subjects were self-reported AfA.

**CFS.** The CFS study is a prospective family-based study originally designed to study the risk factors for sleep apnea that included 2534 subjects (46% AfA) from 352 families in the Cleveland, Ohio metropolitan area examined for up to four visits in 16 years (3). The mean family size was  $4.4 \pm 3.5$  subjects per family in all AfA participants. In this study, 81 T2D and 98 NGT related subjects at the fourth visit who were AfA were included. The respective mean family size was  $2.5 \pm 1.9$  subjects per family, and 30% of families are singletons.

**JHS.** The JHS is a prospective population-based study to examine the risk factors of cardiovascular diseases among 5301 AfA from two cohorts of unrelated (aged 35-84 years) and nested family-based (aged  $\geq 21$  years) subjects in the Jackson, Mississippi metropolitan area (4). The mean family size was  $1.4 \pm 1.5$  subjects per family. In this study, 333 T2D and 1450 NGT subjects at baseline visit who were not enrolled in the ARIC study were included. The respective mean family size was  $1.3 \pm 1.4$  subjects per family, and 88% of families are singletons. Family relationship was not accounted during association analysis due to the low degree of relatedness.

**MESA.** The MESA is a prospective community-based study of the characteristics of subclinical cardiovascular disease and included 6,814 individuals (28% AfA) free from known cardiovascular disease between 45-84 years old at baseline (5). Subjects were recruited from six field centers (Wake Forest School of Medicine, Columbia University, Johns Hopkins University, University of Minnesota, Northwestern University and University of California - Los Angeles). Data from up to the fourth visit are available for analyses. In this study, 411 T2D subjects diagnosed at any visits and 793 subjects with NGT in all visits who were self-reported AfA were included.

**WFSM.** The WFSM is a cross-sectional case-control study designed to examine the genetics of T2D and end-stage renal disease (ESRD) in AfA (6; 7). In this study, the cases included 932 subjects with both T2D and ESRD recruited from dialysis facilities. In addition, cases had at least one of the following inclusion criteria: a) T2D diagnosed at least 5 years before initiating renal replacement therapy, b) background or greater diabetic retinopathy and/or c)  $\geq 100$  mg/dl proteinuria on urinalysis in the absence of other causes of nephropathy. The controls included 856 AfA subjects without a current diagnosis of diabetes or renal disease recruited from the community and internal medicine clinics. All subjects were recruited in North Carolina, South Carolina, Georgia, Tennessee or Virginia.

SUPPLEMENTARY DATA

**Supplementary Table 1.** Selection of T2D-associated index SNPs and power to detect previously reported effect size in this study

| Reported loci        | Index SNP <sup>†</sup> | Chr | Position  | RA/NRA <sup>‡</sup> | Flanking Region (bp) <sup>§</sup> |           | Length (kb) | Population | OR for T2D | References | N <sub>eff</sub> | Power |
|----------------------|------------------------|-----|-----------|---------------------|-----------------------------------|-----------|-------------|------------|------------|------------|------------------|-------|
| <i>NOTCH2-ADAM30</i> | rs10923931             | 1   | 120319482 | T/G                 | 120055542                         | 120500700 | 445.158     | European   | 1.10       | (8)        | 6700             | 0.79  |
| <i>PROX1</i>         | rs340874*              | 1   | 212225879 | C/T                 | 212075919                         | 212356406 | 280.487     | European   | 1.07       | (9)        | 6701             | 0.36  |
| <i>GCKR</i>          | rs780094*              | 2   | 27594741  | C/T                 | 27304471                          | 28067415  | 762.944     | European   | 1.06       | (9)        | 6694             | 0.27  |
| <i>THADA</i>         | rs7578597              | 2   | 43586327  | T/C                 | 43202889                          | 43804094  | 601.205     | European   | 1.14       | (8)        | 6701             | 0.91  |
| <i>BCL11A</i>        | rs243021               | 2   | 60438323  | A/G                 | 60299636                          | 60563915  | 264.279     | European   | 1.08       | (10)       | 6701             | 0.64  |
| <i>RBMS1-ITGB6</i>   | rs7593730              | 2   | 160879700 | C/T                 | 160688143                         | 161152308 | 464.165     | European   | 1.09       | (11)       | 6701             | 0.71  |
| <i>IRS1</i>          | rs7578326              | 2   | 226728897 | A/G                 | 226506229                         | 226989927 | 483.698     | European   | 1.10       | (10)       | 6701             | 0.81  |
| <i>PPARG</i>         | rs1801282              | 3   | 12368125  | C/G                 | 12142084                          | 12488339  | 346.255     | European   | 1.12       | (8)        | 6531             | 0.14  |
| <i>ADAMTS9</i>       | rs4607103              | 3   | 64686944  | C/T                 | 64573853                          | 64804932  | 231.079     | European   | 1.08       | (8)        | 6701             | 0.55  |
| <i>ADCY5</i>         | rs11708067*            | 3   | 124548468 | A/G                 | 124347118                         | 124713944 | 366.826     | European   | 1.12       | (9)        | 6698             | 0.63  |
| <i>IGF2BP2</i>       | rs4402960              | 3   | 186994381 | T/G                 | 186855759                         | 187131377 | 275.618     | European   | 1.17       | (8)        | 6701             | 1     |
| <i>WFS1-PPP2R2C</i>  | rs4689388              | 4   | 6320957   | A/G                 | 6215869                           | 6475686   | 259.817     | European   | 1.13       | (12)       | 6701             | 0.89  |
| <i>ZBED3</i>         | rs4457053              | 5   | 76460705  | G/A                 | 76360705                          | 76590315  | 229.61      | European   | 1.07       | (10)       |                  | -     |
| <i>CDKAL1</i>        | rs10440833             | 6   | 20796100  | A/T                 | 20543949                          | 20933219  | 389.27      | European   | 1.25       | (10)       | 6701             | 1     |
| <i>DGKB-TMEM195</i>  | rs2191349*             | 7   | 15030834  | T/G                 | 14883467                          | 15132137  | 248.67      | European   | 1.06       | (9)        | 6701             | 0.41  |
| <i>JAZF1</i>         | rs864745               | 7   | 28147081  | T/C                 | 28004718                          | 28322765  | 318.047     | European   | 1.09       | (8)        | 6701             | 0.61  |
| <i>GCK</i>           | rs4607517*             | 7   | 44202193  | A/G                 | 44090246                          | 44315353  | 225.107     | European   | 1.07       | (9)        | 6701             | 0.25  |
| <i>KLF14</i>         | rs972283               | 7   | 130117394 | G/A                 | 129975084                         | 130218730 | 243.646     | European   | 1.06       | (10)       | 6701             | 0.24  |
| <i>TP53INP1</i>      | rs896854               | 8   | 96029687  | T/C                 | 95764264                          | 96275026  | 510.762     | European   | 1.05       | (10)       | 6701             | 0.28  |
| <i>SLC30A8</i>       | rs3802177              | 8   | 118254206 | G/A                 | 118153964                         | 118389451 | 235.487     | European   | 1.15       | (10)       | 6701             | 0.59  |
| <i>PTPRD</i>         | rs17584499             | 9   | 8869118   | T/C                 | 8769118                           | 8969118   | 200         | East Asian | 1.61       | (13)       | 5234             | 1     |
| <i>CDKN2A-CDKN2B</i> | rs10811661             | 9   | 22124094  | T/C                 | 22017613                          | 22226489  | 208.876     | European   | 1.19       | (10)       | 6698             | 0.65  |
| <i>CHCHD9</i>        | rs13292136             | 9   | 81141948  | C/T                 | 80971650                          | 81297538  | 325.888     | European   | 1.08       | (10)       | 6701             | 0.25  |
| <i>CDC123-CAMK1D</i> | rs10906115             | 10  | 12355003  | A/G                 | -                                 | -         | -           | East Asian | 1.17       | (14)       | 6648             | 0.98  |

SUPPLEMENTARY DATA

|                      |             |    |           |     |           |           |         |            |      |      |      |      |
|----------------------|-------------|----|-----------|-----|-----------|-----------|---------|------------|------|------|------|------|
| <i>CDC123-CAMK1D</i> | rs12779790  | 10 | 12368016  | G/A | 12179950  | 12468016  | 288.066 | European   | 1.10 | (8)  | 6701 | 0.53 |
| <i>HHEX-IDE</i>      | rs5015480   | 10 | 94455539  | C/T | 94092885  | 94582696  | 489.811 | European   | 1.18 | (10) | 6696 | 1    |
| <i>TCF7L2</i>        | rs7903146   | 10 | 114748339 | T/C | 114638487 | 114903037 | 264.55  | European   | 1.40 | (10) | 6701 | 1    |
| <i>KCNQ1</i>         | rs231362    | 11 | 2648047   | G/A | 2548047   | 2915016   | 366.969 | European   | 1.07 | (10) | 6701 | 0.38 |
| <i>KCNQ1</i>         | rs2237892   | 11 | 2796327   | C/T | -         | -         | -       | East Asian | 1.40 | (15) | 6701 | 1    |
| <i>KCNJ11</i>        | rs5215      | 11 | 17365206  | C/T | 16958130  | 17478436  | 520.306 | European   | 1.09 | (8)  | 6693 | 0.35 |
| <i>CENTD2</i>        | rs1552224   | 11 | 72110746  | A/C | 71942053  | 72629111  | 687.058 | European   | 1.14 | (10) | 6531 | 0.23 |
| <i>MTNR1B</i>        | rs1387153   | 11 | 92313476  | T/C | 92207378  | 92464969  | 257.591 | European   | 1.08 | (10) | 6701 | 0.64 |
| <i>HMGA2</i>         | rs1531343   | 12 | 64461161  | C/G | 64351738  | 64680062  | 328.324 | European   | 1.08 | (10) | 6700 | 0.64 |
| <i>TSPAN8-LGR5</i>   | rs7961581   | 12 | 69949369  | C/T | 69775513  | 70052453  | 276.94  | European   | 1.08 | (8)  | 6701 | 0.49 |
| <i>HNF1A</i>         | rs7957197   | 12 | 119945069 | T/A | 119581507 | 120163407 | 581.9   | European   | 1.05 | (10) | 6701 | 0.18 |
| <i>SPRY2</i>         | rs1359790   | 13 | 79615157  | G/A | 79466875  | 79742662  | 275.787 | East Asian | 1.20 | (14) | 6688 | 0.85 |
| <i>C2CD4A-C2CD4B</i> | rs7172432   | 15 | 60183681  | A/G | 60070025  | 60373586  | 303.561 | East Asian | 1.10 | (16) | 6701 | 0.78 |
| <i>C2CD4B</i>        | rs11071657* | 15 | 60221254  | A/G | -         | -         | -       | European   | 1.03 | (9)  | 6701 | 0.10 |
| <i>ZFAND6</i>        | rs11634397  | 15 | 78219277  | G/A | 78032561  | 78319277  | 286.716 | European   | 1.05 | (10) | 6701 | 0.32 |
| <i>PRC1</i>          | rs8042680   | 15 | 89322341  | A/C | 89151445  | 89467866  | 316.421 | European   | 1.06 | (10) | 6636 | 0.25 |
| <i>FTO</i>           | rs8050136   | 16 | 52373776  | A/C | 52255409  | 52502988  | 247.579 | European   | 1.15 | (8)  | 6700 | 0.99 |
| <i>SRR</i>           | rs391300    | 17 | 2163008   | C/T | 1930631   | 2284211   | 353.58  | East Asian | 1.26 | (13) | 6701 | 1    |
| <i>HNF1B</i>         | rs4430796   | 17 | 33172153  | G/A | 33070413  | 33280426  | 210.013 | European   | 1.14 | (10) |      | -    |

<sup>†</sup> The independent index SNP for each locus was selected from the study showing the lowest  $p$  value ( $P < 5 \times 10^{-8}$ ) for T2D risk in the catalog of published GWAS at National Human Genome Research Institute for T2DM and related glucose homeostasis traits. SNPs in asterisk were initially identified to be associated with fasting glucose (22). Index SNPs for *PPARG* ( $P = 2 \times 10^{-4}$ ) and *HNF1B* ( $P = 2 \times 10^{-6}$ ) were included due to strong candidacy and consistent replication despite not reaching genome-wide significance.

<sup>‡</sup> risk allele (RA) and non-risk allele (NRA) as reported in the references. Alleles were indexed to the forward strand of NCBI Build 36.

<sup>§</sup> flanking region was defined as the boundary of the farthest SNPs that show LD at  $r^2 \geq 0.3$  with the index SNP at the reported populations and further extended by 100kb.

<sup>§</sup> *ZBED3* rs4457053 and *HNF1B* rs4430796 failed quality control in this study and power were not reported

T2D: type 2 diabetes;  $N_{\text{eff}}$ : effective sample size

SUPPLEMENTARY DATA

**Supplementary Table 2.** Univariate and conditional analyses of index and best SNPs for association with T2D in African Americans.

| Reported             | Univariate Analysis |                 |          |            |                 |          | Conditional Analysis |          |                 |       |
|----------------------|---------------------|-----------------|----------|------------|-----------------|----------|----------------------|----------|-----------------|-------|
| Loci                 | Best SNP*           |                 |          | Index SNP† |                 |          | Best SNP‡            |          | Index SNP§      |       |
|                      |                     | OR (95% CI)     | P        |            | OR (95% CI)     | P        | OR (95% CI)          | P        | OR (95% CI)     | P     |
| <i>KLF14</i>         | rs13234269          | 1.26(1.14-1.40) | 1.55E-05 | rs972283   | 1.24(1.09-1.41) | 8.12E-04 | 1.26(1.1-1.44)       | 7.53E-04 | 1.04(0.89-1.22) | 0.620 |
| <i>HMGA2</i>         | rs12049974          | 1.24(1.14-1.35) | 1.73E-06 | rs1531343  | 0.91(0.84-0.99) | 0.022    | 1.35(1.18-1.53)      | 5.07E-06 | 1.14(1-1.29)    | 0.051 |
| <i>NOTCH2-ADAM30</i> | rs12075171          | 1.34(1.15-1.55) | 1.25E-04 | rs10923931 | 1.05(0.96-1.14) | 0.256    | 1.33(1.14-1.54)      | 2.08E-04 | 1.02(0.94-1.12) | 0.584 |
| <i>KCNQ1</i>         | rs231361            | 1.17(1.07-1.28) | 6.64E-04 | rs231362   | 1.07(0.95-1.20) | 0.251    | 1.13(1.02-1.25)      | 0.018    | 1.03(0.9-1.17)  | 0.661 |
| <i>KCNQ1</i>         | rs231361            | 1.17(1.07-1.28) | 6.64E-04 | rs2237892  | 1.25(1.09-1.43) | 1.80E-03 | 1.15(1.05-1.27)      | 2.99E-03 | 1.21(1.04-1.41) | 0.012 |

\* meta-analysis of associations of the best SNP adjusted for age, gender, study center, PC1 and corrected for study-specific inflation factor

† meta-analysis of associations of the index SNP adjusted for age, gender, study center, PC1 and corrected for study-specific inflation factor

‡ meta-analysis of associations of the best SNP adjusted for age, gender, study center, PC1, index SNP and corrected for study-specific inflation factor

§ meta-analysis of associations of the index SNP adjusted for age, gender, study center, PC1, best SNP and corrected for study-specific inflation factor

SUPPLEMENTARY DATA

**Supplementary Table 3.** Allele frequency, fixation index ( $F_{ST}$ ) and Integration Haplotype Scores (iHS) of index SNPs in African Americans and HapMap CEU, JPT+CHB (ASN) and YRI populations

| Reported Loci        | Index SNP  | RA/NRA* | RAF in CEU (ASN) <sup>†</sup> | RAF in AfA | RAF  CEU (ASN) <sup>†</sup> - AfA | $F_{ST}$ in CEU (ASN) <sup>†</sup> vs YRI <sup>‡</sup> | iHS in CEU (ASN) <sup>†,§</sup> | iHS in YRI <sup>§</sup> |
|----------------------|------------|---------|-------------------------------|------------|-----------------------------------|--------------------------------------------------------|---------------------------------|-------------------------|
| <i>NOTCH2-ADAM30</i> | rs10923931 | T/G     | 0.09                          | 0.33       | 0.24                              | 0.105                                                  | <b>2.25</b>                     | -1.63                   |
| <i>PROX1</i>         | rs340874   | C/T     | 0.56                          | 0.17       | 0.40                              | 0.207                                                  | -0.06                           | -0.09                   |
| <i>GCKR</i>          | rs780094   | C/T     | 0.61                          | 0.82       | 0.22                              | 0.095                                                  | -0.39                           | 0.14                    |
| <i>THADA</i>         | rs7578597  | T/C     | 0.88                          | 0.73       | 0.15                              | 0.071                                                  | -1.00                           | 1.17                    |
| <i>BCL11A</i>        | rs243021   | A/G     | 0.48                          | 0.39       | 0.09                              | 0.005                                                  | 0.13                            | 0.58                    |
| <i>RBMS1-ITGB6</i>   | rs7593730  | C/T     | 0.83                          | 0.62       | 0.21                              | 0.059                                                  | -1.03                           | -0.93                   |
| <i>IRS1</i>          | rs7578326  | A/G     | 0.65                          | 0.57       | 0.08                              | 0.004                                                  | 0.27                            | 1.20                    |
| <i>PPARG</i>         | rs1801282  | C/G     | 0.90                          | 0.98       | 0.08                              | -                                                      | -0.57                           |                         |
| <i>ADAMTS9</i>       | rs4607103  | C/T     | 0.81                          | 0.71       | 0.10                              | 0.01                                                   | 0.54                            | 0.89                    |
| <i>ADCY5</i>         | rs11708067 | A/G     | 0.77                          | 0.85       | 0.08                              | 0.035                                                  | -0.36                           | -0.79                   |
| <i>IGF2BP2</i>       | rs4402960  | T/G     | 0.30                          | 0.52       | 0.22                              | 0.068                                                  | 1.64                            | -0.31                   |
| <i>WFS1-PPP2R2C</i>  | rs4689388  | A/G     | 0.67                          | 0.71       | 0.04                              | 0.001                                                  | 1.68                            | 0.79                    |
| <i>ZBED3</i>         | rs4457053  | G/A     | 0.26                          | -          | -                                 | -                                                      | 0.28                            | -                       |
| <i>CDKAL1</i>        | rs10440833 | A/T     | 0.25                          | 0.22       | 0.03                              | -                                                      |                                 | -                       |
| <i>DGKB-TMEM195</i>  | rs2191349  | T/G     | 0.47                          | 0.60       | 0.13                              | 0.016                                                  | -0.13                           | -0.07                   |
| <i>JAZF1</i>         | rs864745   | T/C     | 0.49                          | 0.74       | 0.26                              | 0.063                                                  | -1.56                           | 0.02                    |
| <i>GCK</i>           | rs4607517  | A/G     | 0.20                          | 0.10       | 0.10                              | 0.045                                                  | -0.26                           | -0.20                   |
| <i>KLF14</i>         | rs972283   | G/A     | 0.55                          | 0.85       | 0.30                              | 0.192                                                  | -0.87                           | 1.15                    |
| <i>TP53INP1</i>      | rs896854   | T/C     | 0.44                          | 0.69       | 0.25                              | 0.102                                                  | -0.47                           | -0.81                   |
| <i>SLC30A8</i>       | rs3802177  | G/A     | 0.76                          | 0.91       | 0.15                              | 0.07                                                   | -1.86                           | -0.59                   |
| <i>PTPRD</i>         | rs17584499 | T/C     | (0.09)                        | 0.06       | (0.03)                            | (0.034)                                                | (-0.73)                         | -                       |
| <i>CDKN2A-CDKN2B</i> | rs10811661 | T/C     | 0.80                          | 0.93       | 0.13                              | -                                                      | 0.33                            | -                       |
| <i>CHCHD9</i>        | rs13292136 | C/T     | 0.93                          | 0.91       | 0.03                              | 0.002                                                  | -1.04                           | -1.14                   |
| <i>CDC123-</i>       | rs10906115 | A/G     | (0.65)                        | 0.69       | (0.04)                            | (0.001)                                                | (0.62)                          | -0.34                   |

SUPPLEMENTARY DATA

|                      |            |     |        |      |        |              |             |       |
|----------------------|------------|-----|--------|------|--------|--------------|-------------|-------|
| <i>CAMK1D</i>        |            |     |        |      |        |              |             |       |
| <i>CDC123-CAMK1D</i> | rs12779790 | G/A | 0.23   | 0.13 | 0.10   | -            | -           | -     |
| <i>HHEX-IDE</i>      | rs5015480  | C/T | 0.58   | 0.62 | 0.04   | 0            | 0.48        | -0.04 |
| <i>TCF7L2</i>        | rs7903146  | T/C | 0.28   | 0.31 | 0.03   | 0.002        | 0.09        | -0.27 |
| <i>KCNQ1</i>         | rs231362   | G/A | 0.52   | 0.79 | 0.27   | 0.142        | 1.22        | -0.59 |
| <i>KCNQ1</i>         | rs2237892  | C/T | (0.64) | 0.89 | (0.25) | (0.095)      | (-0.62)     | -0.66 |
| <i>KCNJ11</i>        | rs5215     | C/T | 0.40   | 0.09 | 0.30   | 0.243        | -0.44       | -     |
| <i>CENTD2</i>        | rs1552224  | A/C | 0.87   | 0.97 | 0.10   | -            | -           | -     |
| <i>MTNR1B</i>        | rs1387153  | T/C | 0.27   | 0.38 | 0.11   | 0.022        | 0.37        | -0.09 |
| <i>HMGA2</i>         | rs1531343  | C/G | 0.12   | 0.38 | 0.27   | 0.166        | <b>2.33</b> | 1.39  |
| <i>TSPAN8-LGR5</i>   | rs7961581  | C/T | 0.25   | 0.20 | 0.05   | 0.004        | -0.52       | 0.91  |
| <i>HNF1A</i>         | rs7957197  | T/A | 0.85   | 0.86 | 0.01   | 0.001        | -1.42       | 0.31  |
| <i>SPRY2</i>         | rs1359790  | G/A | (0.69) | 0.89 | (0.20) | (0.061)      | (-0.60)     | 1.45  |
| <i>C2CD4A-C2CD4B</i> | rs7172432  | A/G | (0.55) | 0.31 | (0.24) | (0.114)      | (-1.11)     | -1.34 |
| <i>C2CD4B</i>        | rs11071657 | A/G | 0.59   | 0.86 | 0.27   | 0.171        | 1.07        | -1.65 |
| <i>ZFAND6</i>        | rs11634397 | G/A | 0.64   | 0.44 | 0.21   | -            | 0.02        | -     |
| <i>PRC1</i>          | rs8042680  | A/C | 0.26   | 0.84 | 0.58   | <b>0.597</b> | -1.39       | -     |
| <i>FTO</i>           | rs8050136  | A/C | 0.46   | 0.43 | 0.03   | 0            | <b>2.06</b> | 1.12  |
| <i>SRR</i>           | rs391300   | C/T | (0.78) | 0.49 | (0.29) | (0.097)      | (1.75)      | 0.14  |
| <i>HNF1B</i>         | rs4430796  | G/A | 0.51   | -    | -      | 0.006        | 0.85        | 0.48  |

\* risk allele (RA) and non-risk allele (NRA) as reported previously in European or East Asian populations. Alleles were indexed to the forward strand of NCBI Build 36.

† risk allele frequency,  $F_{ST}$  and  $iHS$  were shown for HapMap CEU population in loci reported in Europeans, and for HapMap JPT+CHB (ASN) populations in loci reported in East Asians

‡  $F_{ST}$  above top 5 percentile for pairwise population comparison are bolded

§  $iHS > 2$  or  $< -2$  represented suggestive evidence of recent positive selection are bolded

SUPPLEMENTARY DATA

**Supplementary Figure 1.** Odds ratio (95% CI) of index SNPs in African Americans (this study), individuals of European descent (17;18;22;28;29), and Asian descent (19;20;21;30) sorted in descending effect size in African Americans.

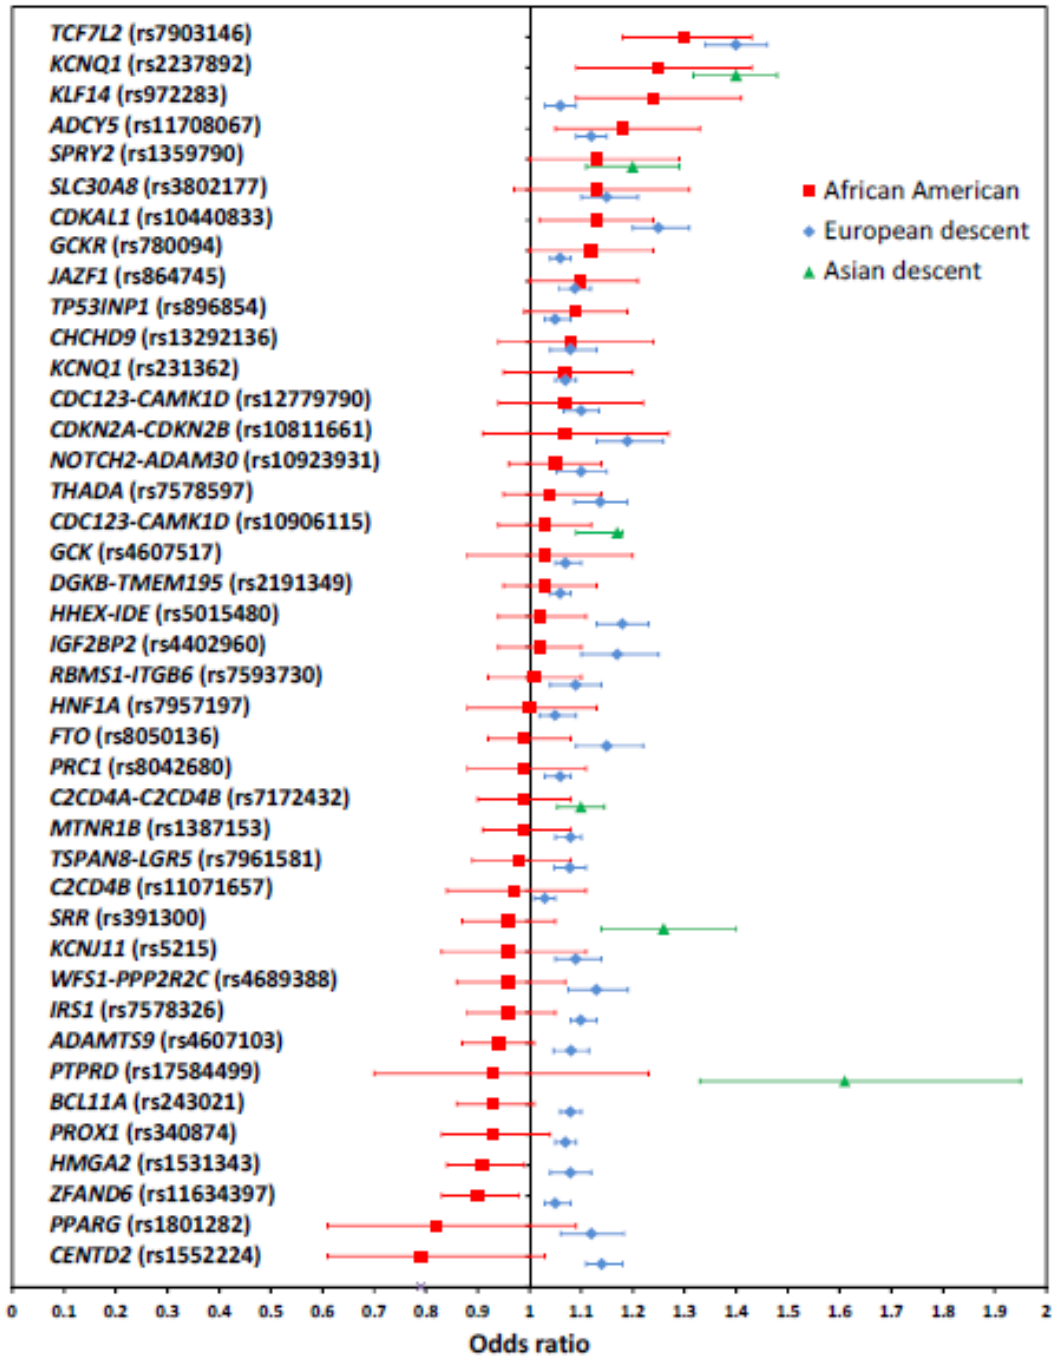

## SUPPLEMENTARY DATA

### References

1. The ARIC Investigators: The Atherosclerosis Risk in Communities (ARIC) Study: design and objectives. The ARIC investigators. *Am J Epidemiol* 129:687-702, 1989
2. Friedman GD, Cutter GR, Donahue RP, Hughes GH, Hulley SB, Jacobs DR, Jr., Liu K, Savage PJ: CARDIA: study design, recruitment, and some characteristics of the examined subjects. *J Clin Epidemiol* 41:1105-1116, 1988
3. Redline S, Tishler PV, Tosteson TD, Williamson J, Kump K, Browner I, Ferrette V, Krejci P: The familial aggregation of obstructive sleep apnea. *Am J Respir Crit Care Med* 151:682-687, 1995
4. Taylor HA, Jr., Wilson JG, Jones DW, Sarpong DF, Srinivasan A, Garrison RJ, Nelson C, Wyatt SB: Toward resolution of cardiovascular health disparities in African Americans: design and methods of the Jackson Heart Study. *Ethn Dis* 15:S6-4-17, 2005
5. Bild DE, Bluemke DA, Burke GL, Detrano R, Diez Roux AV, Folsom AR, Greenland P, Jacob DR, Jr., Kronmal R, Liu K, Nelson JC, O'Leary D, Saad MF, Shea S, Szklo M, Tracy RP: Multi-ethnic study of atherosclerosis: objectives and design. *Am J Epidemiol* 156:871-881, 2002
6. McDonough CW, Palmer ND, Hicks PJ, Roh BH, An SS, Cooke JN, Hester JM, Wing MR, Bostrom MA, Rudock ME, Lewis JP, Talbert ME, Blevins RA, Lu L, Ng MC, Sale MM, Divers J, Langefeld CD, Freedman BI, Bowden DW: A genome-wide association study for diabetic nephropathy genes in African Americans. *Kidney Int* 79:563-572, 2011
7. Palmer ND, McDonough CW, Hicks PJ, Roh BH, Wing MR, An SS, Hester JM, Cooke JN, Bostrom MA, Rudock ME, Talbert ME, Lewis JP, Ferrara A, Lu L, Ziegler JT, Sale MM, Divers J, Shriner D, Adeyemo A, Rotimi CN, Ng MCY, Langefeld CD, Freedman BI, Bowden DW, Consortium D, Investigators M: A Genome-Wide Association Search for Type 2 Diabetes Genes in African Americans. *PLoS ONE* 7:e29202, 2011
8. Zeggini E, Scott LJ, Saxena R, Voight BF, Marchini JL, Hu T, de Bakker PI, Abecasis GR, Almgren P, Andersen G, Ardlie K, Bostrom KB, Bergman RN, Bonnycastle LL, Borch-Johnsen K, Burtt NP, Chen H, Chines PS, Daly MJ, Deodhar P, Ding CJ, Doney AS, Duren WL, Elliott KS, Erdos MR, Frayling TM, Freathy RM, Gianniny L, Grallert H, Grarup N, Groves CJ, Guiducci C, Hansen T, Herder C, Hitman GA, Hughes TE, Isomaa B, Jackson AU, Jorgensen T, Kong A, Kubalanza K, Kuruvilla FG, Kuusisto J, Langenberg C, Lango H, Lauritzen T, Li Y, Lindgren CM, Lyssenko V, Marvelle AF, Meisinger C, Midthjell K, Mohlke KL, Morken MA, Morris AD, Narisu N, Nilsson P, Owen KR, Palmer CN, Payne F, Perry JR, Pettersen E, Platou C, Prokopenko I, Qi L, Qin L, Rayner NW, Rees M, Roix JJ, Sandbaek A, Shields B, Sjogren M, Steinthorsdottir V, Stringham HM, Swift AJ, Thorleifsson G, Thorsteinsdottir U, Timpson NJ, Tuomi T, Tuomilehto J, Walker M, Watanabe RM, Weedon MN, Willer CJ, Illig T, Hveem K, Hu FB, Laakso M, Stefansson K, Pedersen O, Wareham NJ, Barroso I, Hattersley AT, Collins FS, Groop L, McCarthy MI, Boehnke M, Altshuler D: Meta-analysis of genome-wide association data and large-scale replication identifies additional susceptibility loci for type 2 diabetes. *Nat Genet* 40:638-645, 2008
9. Dupuis J, Langenberg C, Prokopenko I, Saxena R, Soranzo N, Jackson AU, Wheeler E, Glazer NL, Bouatia-Naji N, Gloyn AL, Lindgren CM, Magi R, Morris AP, Randall J, Johnson T, Elliott P, Rybin D, Thorleifsson G, Steinthorsdottir V, Henneman P, Grallert H, Dehghan A, Hottenga JJ, Franklin CS, Navarro P, Song K, Goel A, Perry JR, Egan JM, Lajunen T, Grarup N, Sparso T, Doney A, Voight BF, Stringham HM, Li M, Kanoni S, Shrader P, Cavalcanti-Proenca C, Kumari M, Qi L, Timpson NJ, Gieger C, Zabena C, Rocheleau G, Ingelsson E, An P, O'Connell J, Luan J, Elliott A, McCarroll SA, Payne F, Roccascaccia RM, Pattou F, Sethupathy P, Ardlie K, Ariyurek Y, Balkau B, Barter P, Beilby JP, Ben-Shlomo Y, Benediktsson R, Bennett AJ, Bergmann S, Bochud M, Boerwinkle E, Bonnefond A, Bonnycastle LL, Borch-Johnsen K, Bottcher Y, Brunner E, Bumpstead SJ, Charpentier G, Chen YD, Chines P, Clarke R, Coin LJ, Cooper MN, Cornelis M, Crawford G, Crisponi L, Day IN, de Geus EJ, Delplanque J, Dina C, Erdos MR, Fedson AC, Fischer-Rosinsky A, Forouhi NG, Fox CS, Frants R,



## SUPPLEMENTARY DATA

Franzosi MG, Galan P, Goodarzi MO, Graessler J, Groves CJ, Grundy S, Gwilliam R, Gyllensten U, Hadjadj S, Hallmans G, Hammond N, Han X, Hartikainen AL, Hassanali N, Hayward C, Heath SC, Hercberg S, Herder C, Hicks AA, Hillman DR, Hingorani AD, Hofman A, Hui J, Hung J, Isomaa B, Johnson PR, Jorgensen T, Jula A, Kaakinen M, Kaprio J, Kesaniemi YA, Kivimaki M, Knight B, Koskinen S, Kovacs P, Kyvik KO, Lathrop GM, Lawlor DA, Le Bacquer O, LeCoeur C, Li Y, Lyssenko V, Mahley R, Mangino M, Manning AK, Martinez-Larrad MT, McAteer JB, McCulloch LJ, McPherson R, Meisinger C, Melzer D, Meyre D, Mitchell BD, Morken MA, Mukherjee S, Naitza S, Narisu N, Neville MJ, Oostra BA, Orru M, Pakyz R, Palmer CN, Paolisso G, Pattaro C, Pearson D, Peden JF, Pedersen NL, Perola M, Pfeiffer AF, Pichler I, Polasek O, Posthuma D, Potter SC, Pouta A, Province MA, Psaty BM, Rathmann W, Rayner NW, Rice K, Ripatti S, Rivadeneira F, Roden M, Rolandsson O, Sandbaek A, Sandhu M, Sanna S, Sayer AA, Scheet P, Scott LJ, Seedorf U, Sharp SJ, Shields B, Sigurdsson G, Sijbrands EJ, Silveira A, Simpson L, Singleton A, Smith NL, Sovio U, Swift A, Syddall H, Syvanen AC, Tanaka T, Thorand B, Tichet J, Tonjes A, Tuomi T, Uitterlinden AG, van Dijk KW, van Hoek M, Varma D, Visvikis-Siest S, Vitart V, Vogelzangs N, Waeber G, Wagner PJ, Walley A, Walters GB, Ward KL, Watkins H, Weedon MN, Wild SH, Willemssen G, Witteman JC, Yarnell JW, Zeggini E, Zelenika D, Zethelius B, Zhai G, Zhao JH, Zillikens MC, Borecki IB, Loos RJ, Meneton P, Magnusson PK, Nathan DM, Williams GH, Hattersley AT, Silander K, Salomaa V, Smith GD, Bornstein SR, Schwarz P, Spranger J, Karpe F, Shuldiner AR, Cooper C, Dedoussis GV, Serrano-Rios M, Morris AD, Lind L, Palmer LJ, Hu FB, Franks PW, Ebrahim S, Marmot M, Kao WH, Pankow JS, Sampson MJ, Kuusisto J, Laakso M, Hansen T, Pedersen O, Pramstaller PP, Wichmann HE, Illig T, Rudan I, Wright AF, Stumvoll M, Campbell H, Wilson JF, Bergman RN, Buchanan TA, Collins FS, Mohlke KL, Tuomilehto J, Valle TT, Altshuler D, Rotter JI, Siscovick DS, Penninx BW, Boomsma DI, Deloukas P, Spector TD, Frayling TM, Ferrucci L, Kong A, Thorsteinsdottir U, Stefansson K, van Duijn CM, Aulchenko YS, Cao A, Scuteri A, Schlessinger D, Uda M, Ruukonen A, Jarvelin MR, Waterworth DM, Vollenweider P, Peltonen L, Mooser V, Abecasis GR, Wareham NJ, Sladek R, Froguel P, Watanabe RM, Meigs JB, Groop L, Boehnke M, McCarthy MI, Florez JC, Barroso I: New genetic loci implicated in fasting glucose homeostasis and their impact on type 2 diabetes risk. *Nat Genet* 42:105-116, 2010

10. Voight BF, Scott LJ, Steinthorsdottir V, Morris AP, Dina C, Welch RP, Zeggini E, Huth C, Aulchenko YS, Thorleifsson G, McCulloch LJ, Ferreira T, Grallert H, Amin N, Wu G, Willer CJ, Raychaudhuri S, McCarroll SA, Langenberg C, Hofmann OM, Dupuis J, Qi L, Segre AV, van Hoek M, Navarro P, Ardlie K, Balkau B, Benediktsson R, Bennett AJ, Blagieva R, Boerwinkle E, Bonnycastle LL, Bengtsson Bostrom K, Bravenboer B, Bumpstead S, Burt NP, Charpentier G, Chines PS, Cornelis M, Couper DJ, Crawford G, Doney AS, Elliott KS, Elliott AL, Erdos MR, Fox CS, Franklin CS, Ganser M, Gieger C, Grarup N, Green T, Griffin S, Groves CJ, Guiducci C, Hadjadj S, Hassanali N, Herder C, Isomaa B, Jackson AU, Johnson PR, Jorgensen T, Kao WH, Klopp N, Kong A, Kraft P, Kuusisto J, Lauritzen T, Li M, Lieveise A, Lindgren CM, Lyssenko V, Marre M, Meitinger T, Midthjell K, Morken MA, Narisu N, Nilsson P, Owen KR, Payne F, Perry JR, Petersen AK, Platou C, Proenca C, Prokopenko I, Rathmann W, Rayner NW, Robertson NR, Rocheleau G, Roden M, Sampson MJ, Saxena R, Shields BM, Shrader P, Sigurdsson G, Sparso T, Strassburger K, Stringham HM, Sun Q, Swift AJ, Thorand B, Tichet J, Tuomi T, van Dam RM, van Haften TW, van Herpt T, van Vliet-Ostapchouk JV, Bragi Walters G, Weedon MN, Wijmenga C, Witteman J, Bergman RN, Cauchi S, Collins FS, Gloyn AL, Gyllensten U, Hansen T, Hide WA, Hitman GA, Hofman A, Hunter DJ, Hveem K, Laakso M, Mohlke KL, Morris AD, Palmer CN, Pramstaller PP, Rudan I, Sijbrands E, Stein LD, Tuomilehto J, Uitterlinden A, Walker M, Wareham NJ, Watanabe RM, Abecasis GR, Boehm BO, Campbell H, Daly MJ, Hattersley AT, Hu FB, Meigs JB, Pankow JS, Pedersen O, Wichmann HE, Barroso I, Florez JC, Frayling TM, Groop L, Sladek R, Thorsteinsdottir U, Wilson JF, Illig T, Froguel P, van Duijn CM,

## SUPPLEMENTARY DATA

- Stefansson K, Altshuler D, Boehnke M, McCarthy MI: Twelve type 2 diabetes susceptibility loci identified through large-scale association analysis. *Nat Genet* 42:579-589, 2010
11. Qi L, Cornelis MC, Kraft P, Stanya KJ, Linda Kao WH, Pankow JS, Dupuis J, Florez JC, Fox CS, Pare G, Sun Q, Girman CJ, Laurie CC, Mirel DB, Manolio TA, Chasman DI, Boerwinkle E, Ridker PM, Hunter DJ, Meigs JB, Lee CH, Hu FB, van Dam RM: Genetic variants at 2q24 are associated with susceptibility to type 2 diabetes. *Hum Mol Genet* 19:2706-2715, 2010
  12. Rung J, Cauchi S, Albrechtsen A, Shen L, Rocheleau G, Cavalcanti-Proenca C, Bacot F, Balkau B, Belisle A, Borch-Johnsen K, Charpentier G, Dina C, Durand E, Elliott P, Hadjadj S, Jarvelin MR, Laitinen J, Lauritzen T, Marre M, Mazur A, Meyre D, Montpetit A, Pisinger C, Posner B, Poulsen P, Pouta A, Prentki M, Ribel-Madsen R, Ruukonen A, Sandbaek A, Serre D, Tichet J, Vaxillaire M, Wojtaszewski JF, Vaag A, Hansen T, Polychronakos C, Pedersen O, Froguel P, Sladek R: Genetic variant near IRS1 is associated with type 2 diabetes, insulin resistance and hyperinsulinemia. *Nat Genet* 41:1110-1115, 2009
  13. Tsai FJ, Yang CF, Chen CC, Chuang LM, Lu CH, Chang CT, Wang TY, Chen RH, Shiu CF, Liu YM, Chang CC, Chen P, Chen CH, Fann CS, Chen YT, Wu JY: A genome-wide association study identifies susceptibility variants for type 2 diabetes in Han Chinese. *PLoS Genet* 6:e1000847, 2010
  14. Shu XO, Long J, Cai Q, Qi L, Xiang YB, Cho YS, Tai ES, Li X, Lin X, Chow WH, Go MJ, Seielstad M, Bao W, Li H, Cornelis MC, Yu K, Wen W, Shi J, Han BG, Sim XL, Liu L, Qi Q, Kim HL, Ng DP, Lee JY, Kim YJ, Li C, Gao YT, Zheng W, Hu FB: Identification of new genetic risk variants for type 2 diabetes. *PLoS Genet* 6, 2010
  15. Yasuda K, Miyake K, Horikawa Y, Hara K, Osawa H, Furuta H, Hirota Y, Mori H, Jonsson A, Sato Y, Yamagata K, Hinokio Y, Wang HY, Tanahashi T, Nakamura N, Oka Y, Iwasaki N, Iwamoto Y, Yamada Y, Seino Y, Maegawa H, Kashiwagi A, Takeda J, Maeda E, Shin HD, Cho YM, Park KS, Lee HK, Ng MC, Ma RC, So WY, Chan JC, Lyssenko V, Tuomi T, Nilsson P, Groop L, Kamatani N, Sekine A, Nakamura Y, Yamamoto K, Yoshida T, Tokunaga K, Itakura M, Makino H, Nanjo K, Kadowaki T, Kasuga M: Variants in KCNQ1 are associated with susceptibility to type 2 diabetes mellitus. *Nat Genet* 40:1092-1097, 2008
  16. Yamauchi T, Hara K, Maeda S, Yasuda K, Takahashi A, Horikoshi M, Nakamura M, Fujita H, Grarup N, Cauchi S, Ng DP, Ma RC, Tsunoda T, Kubo M, Watada H, Maegawa H, Okada-Iwabu M, Iwabu M, Shojima N, Shin HD, Andersen G, Witte DR, Jorgensen T, Lauritzen T, Sandbaek A, Hansen T, Ohshige T, Omori S, Saito I, Kaku K, Hirose H, So WY, Beury D, Chan JC, Park KS, Tai ES, Ito C, Tanaka Y, Kashiwagi A, Kawamori R, Kasuga M, Froguel P, Pedersen O, Kamatani N, Nakamura Y, Kadowaki T: A genome-wide association study in the Japanese population identifies susceptibility loci for type 2 diabetes at UBE2E2 and C2CD4A-C2CD4B. *Nat Genet* 42:864-868, 2010
